# Supplementary material for: Assessment of Climatic and Anthropogenic Controls on Bridge Deck Drainage and Sediment Removal
Source: MDPI journal article supplement (doi:10.3390/w13243556), 2021-12-12
Supplement: s1 [file s1]

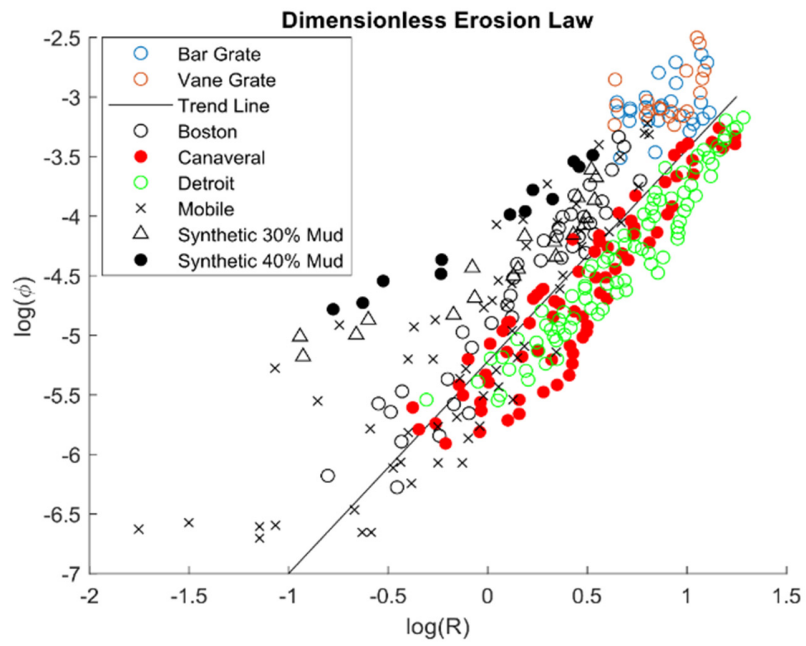

**Figure S1.** Dimensionless erosion rate ( $\phi$ ) and transport stage ( $R$ ) relationship of bar and vane grate erosion tests (blue and orange open circles, respectively) plotted alongside data aggregated from other cohesive studies [15].

**Table S1.** Results of bridge deck drainage survey responses from 22 state DOTs.

| State          | Drain Type               | Typical Size          | Grate Type  | Common Issues                     | Solutions to Issues                           | Clogging Factor                                        | Design Reference              |
|----------------|--------------------------|-----------------------|-------------|-----------------------------------|-----------------------------------------------|--------------------------------------------------------|-------------------------------|
| Alaska         | Scuppers                 | 6" to 8"              | Varies      | Clogging                          | Routine Maintenance                           | None                                                   | HEC-21                        |
| Arkansas       | Grated Inlet             | 24" x 14"             | Bar         | Clogging                          | Routine Maintenance                           | None                                                   | HEC-21                        |
| Colorado       | Grated Inlet             | Varies                | Vane        | Clogging                          | Design for clogging/<br>increase Maintenance  | None                                                   | HEC-21                        |
| Connecticut    | Scupper                  | 2' x 2'               | Bar         | Clogging                          | Routine Maintenance                           | None                                                   | HEC-21                        |
| Delaware       | Scupper and Grated Inlet | 12" x 12"             | N/A         | Clogging                          | No solution                                   | None                                                   | HEC-22                        |
| Georgia        | Scupper                  | 4" dia.               | Bar         | Capacity, Clogging                | No solution                                   | None                                                   | HEC-21                        |
| Hawaii         | Slotted Openings         | 3' x 2'               | Bar         | Clogging                          | Add drains, Maintenance                       | Location Dependent                                     | HEC-12                        |
| Illinois       | Scupper and Grated Inlet | 1' x 1' 1' x 2'       | Vane        | No issues                         | N/A                                           | None                                                   | HEC-21                        |
| Indiana        | Grated Inlet             | 1'8" x 1'7"           | Bar         | Clogging                          | Using Clogging Factor                         | Assume 50% Clogged                                     | Indiana Design Manual         |
| Louisiana      | Scupper                  | 8" dia.               | N/A         | Clogging                          | Routine Maintenance                           | Safety Factor of 2                                     | HEC-21                        |
| Maryland       | Scupper                  | Varies                | Bar         | Clogging                          | Design bridge with higher longitudinal slopes | None                                                   | HEC-22                        |
| Minnesota      | Grated Inlet             | 1'5" x 1'5"           | Cross hatch | Clogging                          | Avoid underdeck pipe system                   | Assume 50% Clogged                                     | HEC-22                        |
| Nebraska       | Grated Inlet             | 3.5' x 1.5'           | Bar         | Clogging                          | Routine Maintenance                           | None                                                   | HEC-21                        |
| Nevada         | Scupper and Grated Inlet | 2' x 3', 9" x 18"     | Bar         | Designing for maintenance         | Avoid Deck Drains                             | Assume 50% for Sag, 25% for high debris, 10% all other | HEC-12, HEC-21, HEC-22        |
| New Hampshire  | Scupper                  | 18" x 6" to 48" x 15" | Cross hatch | Rusting, Clogging                 | Increase Routine Maintenance                  | None                                                   | HEC-21                        |
| New York       | Grated Inlet             | 1'10" x 1'5"          | Bar         | Clogging, Downspout disconnection | Use bridge washing program                    | None                                                   | HEC-21                        |
| North Carolina | Slotted Openings         | 6" dia.               | N/A         | Clogging                          | Paved approach shoulders                      | None                                                   | HEC-21                        |
| Ohio           | Scupper                  | Varies                | Varies      | Clogging                          | Widen shoulders, Reduce speed limits          | None                                                   | OHDOT Manuals                 |
| Oregon         | Grated Inlet             | 2'8" x 1'2"           | Bar         | Clogging                          | Routine Maintenance                           | None                                                   | ODOT Hydraulics Design manual |
| Pennsylvania   | Scupper                  | 1'9" x 1'6"           | Bar         | Clogging                          | Routine Maintenance                           | None                                                   | HEC-22                        |
| South Dakota   | Scupper                  | 4" dia.               | Open        | Capacity                          | More or Larger Inlets                         | None                                                   | HEC-21                        |
| West Virginia  | Scupper                  | 6" or 8" dia.         | Bar or Vane | Clogging                          | Increase Routine Maintenance                  | Designers Discretion                                   | HEC-21                        |

**Table S2.** Breakdown of experimental model components.

| <b>Component</b>            | <b>Description</b>                                                                                                                            | <b>Tolerance</b>                        |
|-----------------------------|-----------------------------------------------------------------------------------------------------------------------------------------------|-----------------------------------------|
| Deck Structure              | Treated 2x4 wood boards running the length of the deck with cross members every 0.30-m.                                                       | -                                       |
| Deck Surface                | 12-mm thick sanded plywood with a steel Z flashing for the curb. Adhered to structure with screws and sealed with roofing sealant.            | -                                       |
| Deck Supports               | 9.5-mm threaded zinc rods at 0.46-m length with aircraft cable suspended from the end attached to the deck structure with full adjustability. | 1.6-mm height adjustability increments. |
| Deck Coating                | Spray adhesive with 0.5-mm silica evenly distributed across the deck surface and curb.                                                        | -                                       |
| Inflow Hose                 | 15.875 diameter PVC hose attached to flow meter at laboratory water system valve.                                                             | +/- 1.00%                               |
| Inlet Opening               | 0.61m square opening with wood inlet supports below the deck surface. Inlet opening were sealed with modeling clay.                           | -                                       |
| Discharge Capture Container | 53-liter plastic container with electronically controlled valve to remove capture discharge. Container was rested in the center of the scale. | -                                       |
| Scale                       | Ohaus SD75 Scale                                                                                                                              | +/- 50g                                 |
